# Supplementary material for: Development of an efficient phenolic sensor based on facile Ag2O/Sb2O3nanoparticles for environmental safety
Source: Royal Society of Chemistry journal article supplement (doi:10.1039/c8na00034d), 2018-11-09
Supplement: c8na00034d1.pdf [file c8na00034d1.pdf]

## Electronic Supporting Information

### Efficient phenolic sensor development based on facile $\text{Ag}_2\text{O}/\text{Sb}_2\text{O}_3$ nanoparticles for environmental safety

Mohammed M. Rahman<sup>a,b,\*</sup>, M.M. Alam<sup>c</sup>, Abdullah M. Asiri<sup>a,b,\*</sup>

<sup>a</sup>Chemistry Department, King Abdulaziz University, Faculty of Science, Jeddah 21589, P.O. Box 80203, Saudi Arabia.

<sup>b</sup>Center of Excellence for Advanced Materials Research, King Abdulaziz University, Jeddah 21589, P.O. Box 80203, Saudi Arabia.

<sup>c</sup>Department of Chemical Engineering and Polymer Science, Shahjalal University of Science and Technology, Sylhet 3100, Bangladesh.

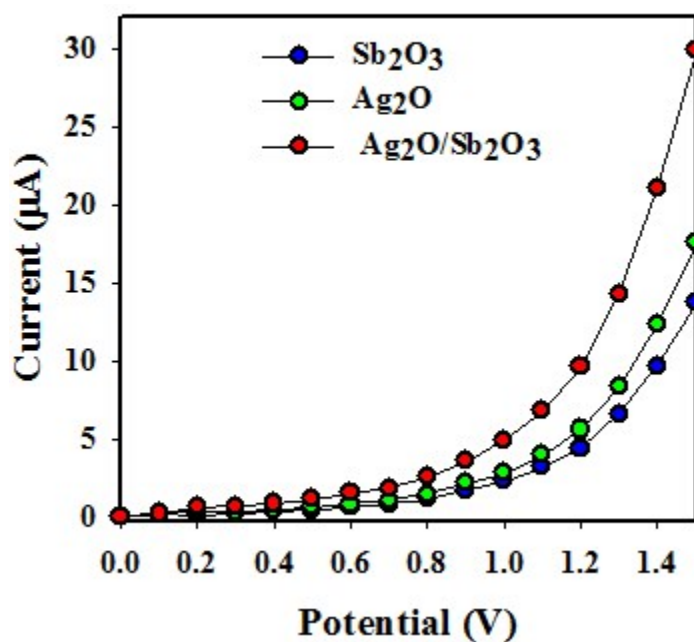

Fig. S1. The comparison between individual and combinational electrochemical responses of undoped and doped metal oxides.
